# Supplementary material for: Androgen receptor-dependent regulation of metabolism in high grade bladder cancer cells
Source: PubMed Central journal article supplement (PMC9889754; doi:10.1038/s41598-023-28692-z), 2023-01-31
Supplement: 41598_2023_28692_MOESM1_ESM.pdf [file 41598_2023_28692_MOESM1_ESM.pdf]

# **Androgen receptor-dependent regulation of metabolism in high grade bladder cancer cells**

Kimberley D. Katleba, Maria-Malvina Tsamouri, Maitreyee Jathal, Han Bit Baek, Rebecca B.

Armenta, Clifford G. Tepper, Gino Cortopassi, Paramita M. Ghosh, Maria Mudryj

Supplementary Figure 1. qRT-PCR primers used in current study.

| Primers        | Forward                  | Reverse                  | Size (bp) |
|----------------|--------------------------|--------------------------|-----------|
| TAR            | TGGATAGCTACTCCGGACCTT    | CCCAGAAGCTTCATCTCCAC     | 125       |
| AR-LBD         | GCCTTGCTCTCTAGCCTCAA     | GTCGTCCACGTGTAAGTTGC     | 102       |
| AR-v19         | TGAAGCAGGGATGACTCTGG     | CCAAATCGAAGTGGATTAATGA   | 103       |
| $\beta$ -Actin | GGAAATCGTGCGTGACATTAAG   | AGCTCGTAGCTCTTCTCCA      | 108       |
| UBA6           | AGAGGTACGTTCTTGAGACAC    | TGGTTCCTAGATCCCATGCTT    | 171       |
| CREB1          | ATTCACAGGAGTCAGTGGATAGT  | CACCGTTACAGTGGTGTATGG    | 182       |
| BCL2A1         | TACAGGCTGGCTCAGGACTAT    | CGCAACATTTTGTAGCACTCTG   | 96        |
| FKBP5          | GACCGCAGGATATACGCCAACAT  | AGTCTTCTTGCCATTGCTTTATTG | 87        |
| mTOR           | GCAGATTTGCCAACTATCTTCGG  | CAGCGGTAAAAGTGTCCCCTG    | 114       |
| MMP1           | CTCTGGAGTAATGTCACACCTCT  | TGTTGGTCCACCTTTCATCTTC   | 199       |
| JUN            | GGCTGGTGTTCGGGAGTGT      | CGCCGCCTTCTGGTCTTTAC     | 261       |
| MMP2           | AGCGAGTGGATGCCGCCTTTAA   | CATCCAGGCATCTGCGATGAG    | 138       |
| HIF1A          | CACCACAGGACAGTACAGGAT    | CGTGCTGAATAATACCACTCACA  | 146       |
| EGR1           | CTTCAACCCTCAGGCGGACA     | GGAAAAGCGGCCAGTATAGGT    | 160       |
| HRK            | GGCAGGCGGAACTTGTAGGAAC   | TCCAGGCGCTGTCTTTACTCTCC  | 197       |
| BAK1           | GTTTTCCGCAGCTACGTTTTT    | GCAGAGGTAAGGTGACCATCTC   | 97        |
| HDAC4          | CCTGGGAATGTACGACGCC      | CCCGTCTTCTGCGTAAC        | 136       |
| DICER          | TGCTATGTCGCCTTGAATGTT    | AATTTCTCGATAGGGGTGGTCTA  | 114       |
| ARL4C          | CTGCTGGTCATCGCCAACA      | ATAGGTGGTGGCCGGGATAA     | 102       |
| ATXN1          | TCGTCATGCAATACGCCGAC     | TACGGGTGAGGAACCGACT      | 202       |
| H6PD           | GCAGAGCACAAGGATCAGTTC    | GGCAGCTACTGTTGATGTTGC    | 196       |
| SRD5A3         | TCTGCCCATCAGTATAAGTGCC   | GTGGAACCCAAAGGTGACGG     | 180       |
| WDTC1          | ACACTCGGAGGTGCTGATTG     | GCGGATGTCATAGAGCCTCAC    | 139       |
| CTNNB1         | CATCTACACAGTTTGATGCTGCT  | GCAGTTTTGTCAGTTCAGGGA    | 150       |
| PARP1          | CGGAGTCTTCGGATAAGCTCT    | TTTCCATCAAACATGGGCGAC    | 136       |
| SDC1           | CCACCATGAGACCTCAACCC     | GCCACTACAGCCGATTCTCC     | 192       |
| GSK3B          | AGACGCTCCCTGTGATTTATGT   | CCGATGGCAGATTCCAAAGG     | 89        |
| FOXO3          | TCACGCACCAATTCTAACGC     | CACGGCTTGCTTACTGAAGG     | 155       |
| FOS            | GGGGCAAGGTGGAACAGTTAT    | CCGCTTGGAGTGTATCAGTCA    | 126       |
| CASP9          | CTCAGACCAGAGATTCGCAAAC   | GCATTTCCCCTCAAACCTCTCAA  | 116       |
| XRCC4          | ATGTTGGTGAACGTGAGAAAAGCA | GCAATGGTGTCCAAGCAATAAC   | 208       |

Supplementary Figure 2. Identified pathway component interactions of five top pathways on T-AR depletion.

Downregulated transcripts- blue, upregulated transcripts- red.

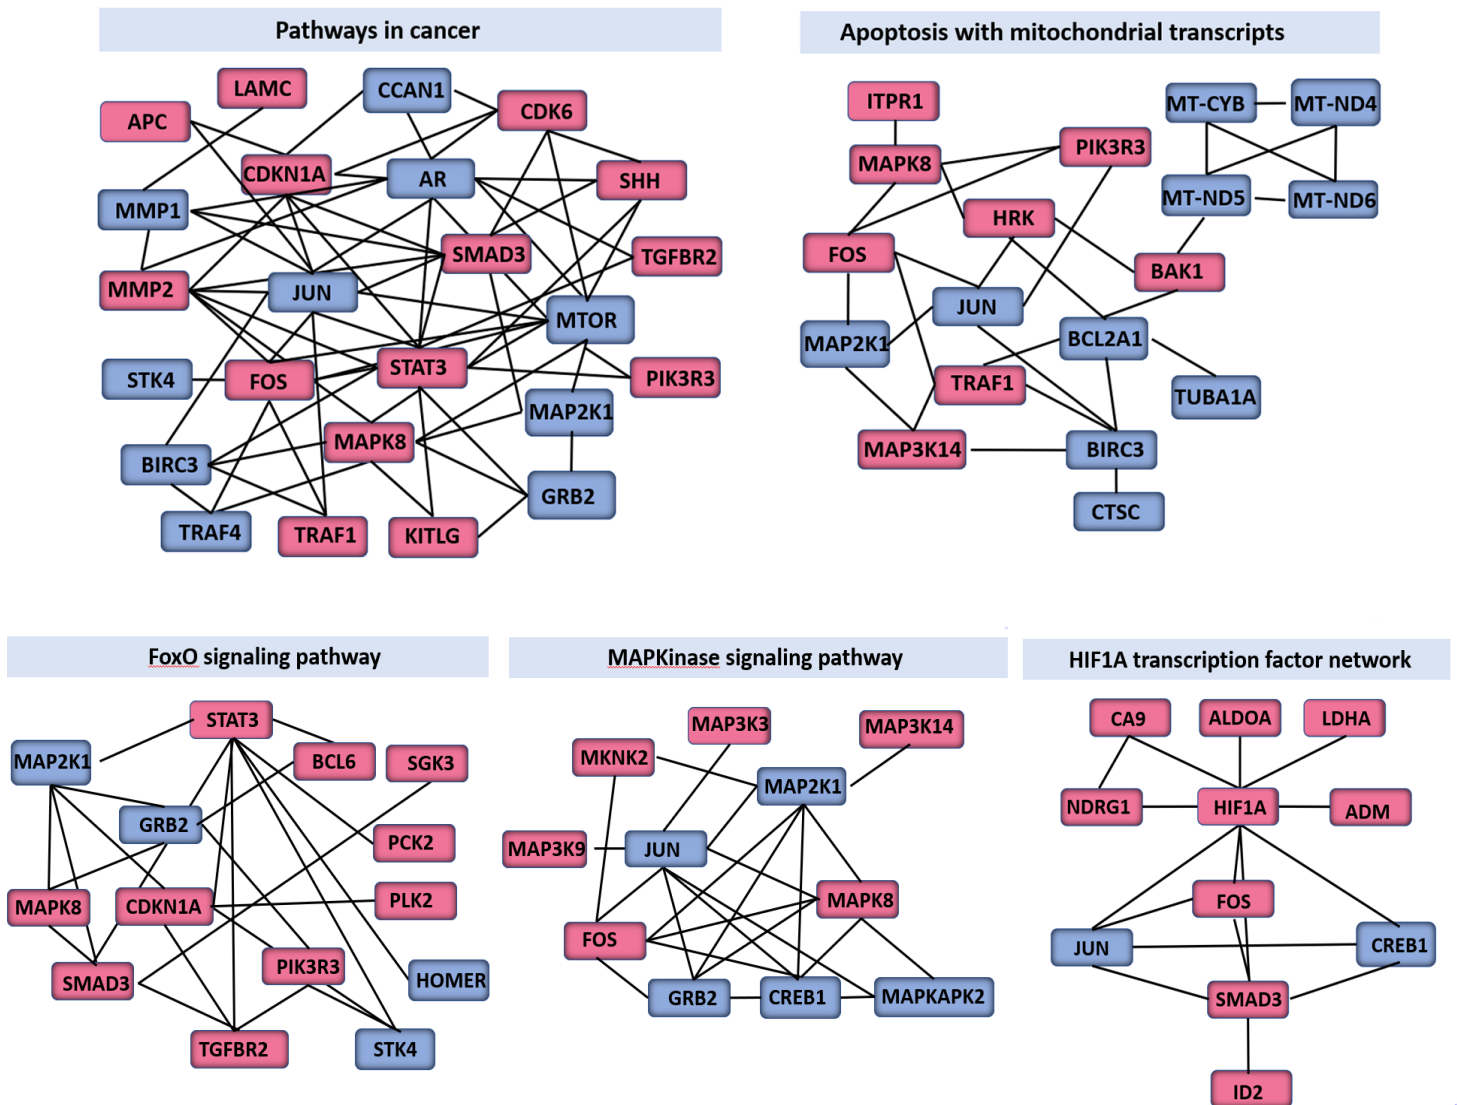

Supplementary Figure 3. Pathway component interactions of pathways most significantly altered on FL-AR depletion. Downregulated transcripts- blue, upregulated transcripts- red.

Plasminogen activated cascade

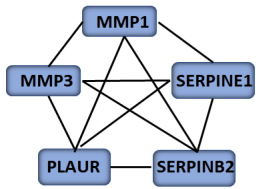

Validated Targets of Fra1 and Fra2

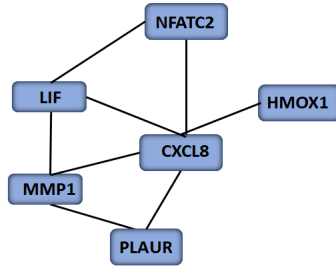

Interleukin 4 and 13 signaling

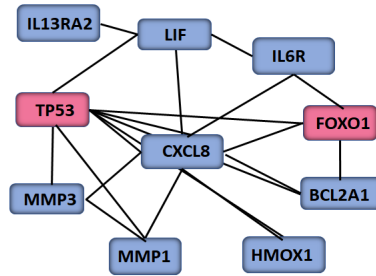

TGF-beta Signaling

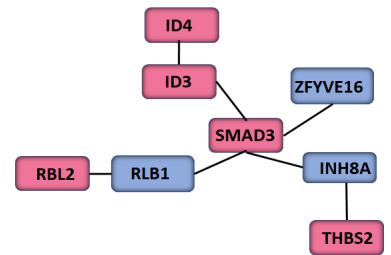

Supplementary Figure 4. TCGA (cBioportal) analysis identified positive and negative correlations between AR and identified AR-regulated transcript.

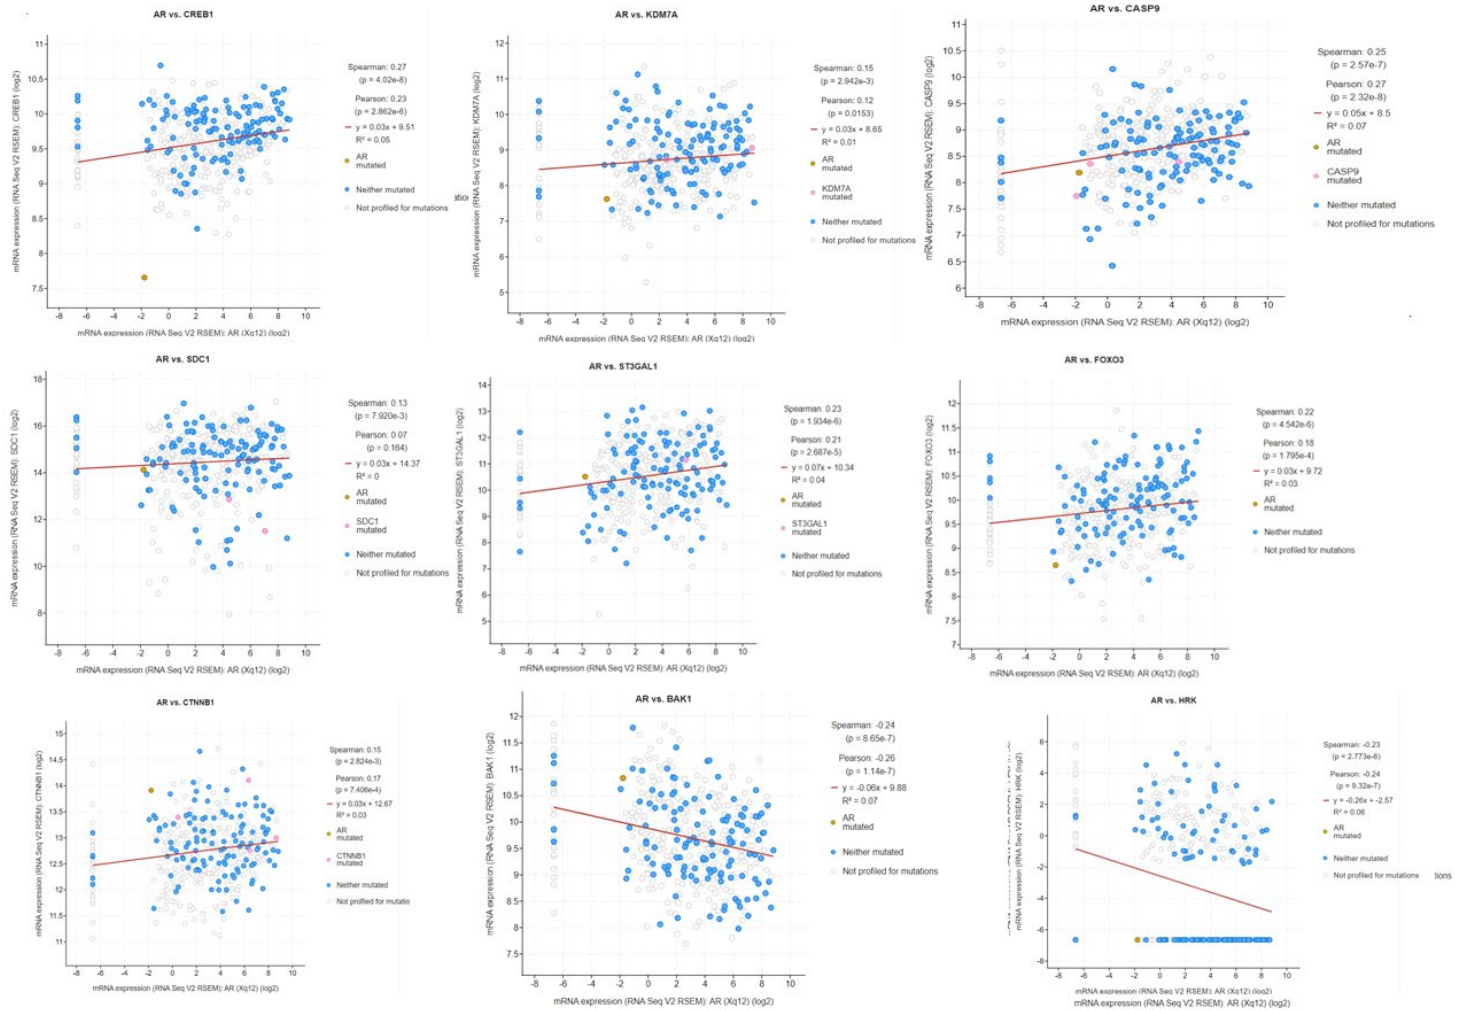

Supplementary Figure 5. Kaplan-Meier curves of disease free and overall survival of various AR-regulated transcripts were obtained from GEPIA2.

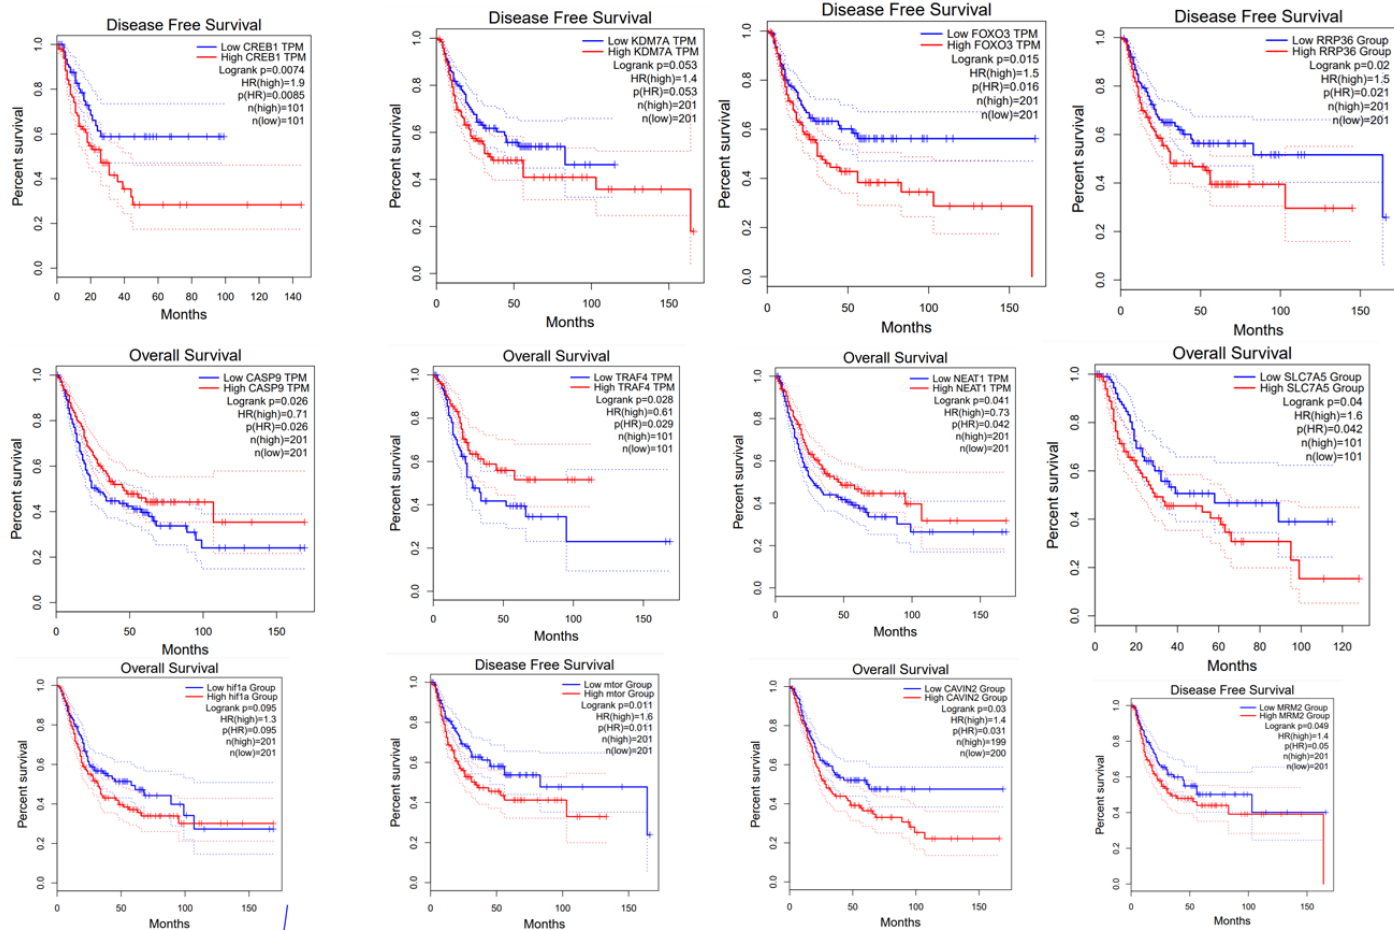

Supplementary Figure 6. Sottnik et al. identified 96 genes with identified AR-binding sites (column 1) that were AR-responsive (column 2). Comparative analysis of our data with the 96 gene set identified genes that were regulated by AR-v19 (column 3), T-AR (column 4), FL-AR (column 5) or AR-v19 overexpression (O-E AR-v19; column 6). Genes that are inversely regulated by R1881 and AR depletion are highlighted in yellow. Transcripts that are identically regulated by R1881 and AR-v19 overexpression are highlighted in green.

| <u>Chip-seq/<br/>AR responsive</u> | <u>Expression change<br/>post-1881 stimulation</u> | <u>AR-v19<br/>k/d</u> | <u>T-AR<br/>k/d</u> | <u>FL-AR<br/>k/d</u> | <u>O-E AR-<br/>v19</u> |
|------------------------------------|----------------------------------------------------|-----------------------|---------------------|----------------------|------------------------|
| ADM                                | Up                                                 | up                    |                     |                      | up                     |
| AFAP1L1                            | Up                                                 | down                  |                     |                      |                        |
| ANGPTL4                            | Up                                                 | up                    |                     |                      |                        |
| ANK2                               | Up                                                 | down                  |                     |                      |                        |
| ARHGEF2                            | Up                                                 | down                  |                     |                      |                        |
| ARNTL2                             | Down                                               |                       |                     |                      |                        |
| ASAP2                              | Up                                                 |                       |                     |                      |                        |
| ATP1A1                             | Up                                                 |                       |                     |                      |                        |
| B3GNT5                             | Up                                                 | up                    |                     |                      |                        |
| BACH1                              | Up                                                 | up                    |                     |                      |                        |
| BAG3                               | Up                                                 | up                    |                     |                      | up                     |
| C10orf90                           | Up                                                 | up                    |                     |                      | up                     |
| CA12                               | Up                                                 | up                    |                     |                      | down                   |
| CAV2                               | Up                                                 | up                    | up                  |                      |                        |
| CCL5                               | Up                                                 | up                    |                     | down                 |                        |
| CD109                              | Up                                                 | up                    |                     |                      |                        |
| CD44                               | Down                                               | down                  |                     |                      | up                     |
| CDC42EP3                           | Up                                                 | up                    |                     |                      |                        |
| CDKN1A                             | Up                                                 |                       |                     |                      | down                   |
| COL13A1                            | Down                                               |                       |                     |                      |                        |
| COPS8                              | Up                                                 |                       |                     |                      |                        |
| CRISPLD2                           | Up                                                 | up                    |                     |                      | up                     |
| DHCR24                             | Up                                                 |                       |                     |                      |                        |
| DKK3                               | Up                                                 |                       |                     |                      |                        |
| DLG1                               | Up                                                 |                       |                     |                      |                        |
| DNER                               | Up                                                 | down                  |                     | down                 | up                     |
| DUSP1                              | Up                                                 | up                    |                     |                      |                        |
| EPAS1                              | Up                                                 | up                    |                     |                      |                        |
| ERRFI1                             | Up                                                 | up                    |                     |                      | down                   |
| ETS1                               | Up                                                 |                       |                     |                      |                        |
| FADS1                              | Up                                                 | down                  |                     |                      |                        |
| FAT4                               | Up                                                 | up                    |                     | up                   |                        |
| FER                                | Up                                                 | up                    |                     |                      |                        |
| FHL1                               | Up                                                 |                       |                     |                      | down                   |
| FKBP5                              | Up                                                 | down                  |                     |                      |                        |
| FNDC3B                             | Up                                                 | up                    |                     |                      |                        |
| FTH1                               | Up                                                 | up                    |                     |                      |                        |
| GADD45A                            | Up                                                 | up                    |                     |                      |                        |
| GLIS3                              | Up                                                 | up                    |                     |                      | up                     |
| IGF2BP3                            | Down                                               |                       |                     |                      |                        |
| IL1R1                              | Up                                                 |                       |                     |                      |                        |

|          |      |      |      |      |      |
|----------|------|------|------|------|------|
| KANK1    | Up   |      |      |      |      |
| KCNMA1   | Up   | up   |      |      | down |
| KLF7     | Up   | up   | up   |      | down |
| METTL7A  | Up   |      |      |      |      |
| MICAL2   | Up   |      |      |      |      |
| MXI1     | Up   | up   |      |      | down |
| NDRG1    | Up   | up   | up   | up   | down |
| NEDD4    | Up   | up   |      |      |      |
| NNMT     | Up   |      |      |      |      |
| NR1D2    | Down |      |      |      |      |
| NR5A2    | Up   |      |      |      |      |
| NRG1     | Down | down |      |      |      |
| NSG1     | Up   |      |      |      |      |
| P4HA2    | Up   | up   |      |      |      |
| P4HA3    | Up   |      |      |      |      |
| PAG1     | Up   |      |      |      |      |
| PALLD    | Down |      |      |      |      |
| PHACTR2  | Up   | up   | up   |      |      |
| PLIN2    | Up   |      |      |      |      |
| PLOD2    | Up   | up   |      | down |      |
| PPP1R3C  | Up   | up   |      |      | down |
| PPP2CB   | Up   |      |      |      |      |
| PRKCH    | Up   |      |      |      |      |
| PXYLP1   | Up   | up   |      |      |      |
| RERE     | Up   | up   |      |      | down |
| RTN4RL1  | Up   |      |      |      |      |
| SEC14L2  | Up   | up   |      |      |      |
| SH3BP4   | Up   | up   |      |      |      |
| SH3KBP1  | Down | down |      |      | down |
| SH3PXD2A | Up   |      |      |      |      |
| SH3RF3   | Up   | up   |      |      |      |
| SLC26A2  | Up   |      |      |      |      |
| SLC39A14 | Up   | down |      |      | down |
| SMOC1    | Up   |      |      |      |      |
| SOCS2    | Up   |      |      |      |      |
| SOD2     | Up   |      |      |      |      |
| SQRDL    | Up   |      |      |      |      |
| SRGN     | Up   |      | down | down | up   |
| STEAP3   | Up   | up   |      |      | down |
| STXBP6   | Up   |      |      |      |      |
| SYNJ2    | Down | up   |      |      |      |
| TBC1D8   | Up   |      |      |      |      |
| TM9SF1   | Up   |      |      |      |      |
| TMEM189  | Up   | up   |      |      |      |
| TMEM189- |      |      |      |      |      |
| UBE2V1   | Up   | up   |      |      |      |
| TMEM44   | Up   | up   |      |      |      |
| TNC      | Down | down |      |      |      |
| TNFAIP3  | Up   |      |      |      |      |



|         |      |      |      |
|---------|------|------|------|
| TRIM16  | Up   | up   | down |
| TRIM16L | Up   | up   |      |
| TRIM9   | Up   | up   | down |
| TSC22D3 | Up   | down |      |
| USP43   | Up   | up   | up   |
| XRCC4   | Down |      |      |
| ZCCHC7  | Down | up   |      |
| ZDHC8   | Up   |      |      |

Supplementary Figure 7. Uncropped images from Figures 2,3 4,5, 6, 7. Top row, from let to right: Fig. 2A, Fig. 3A, Fig 4A., second row, Fig. 4F.

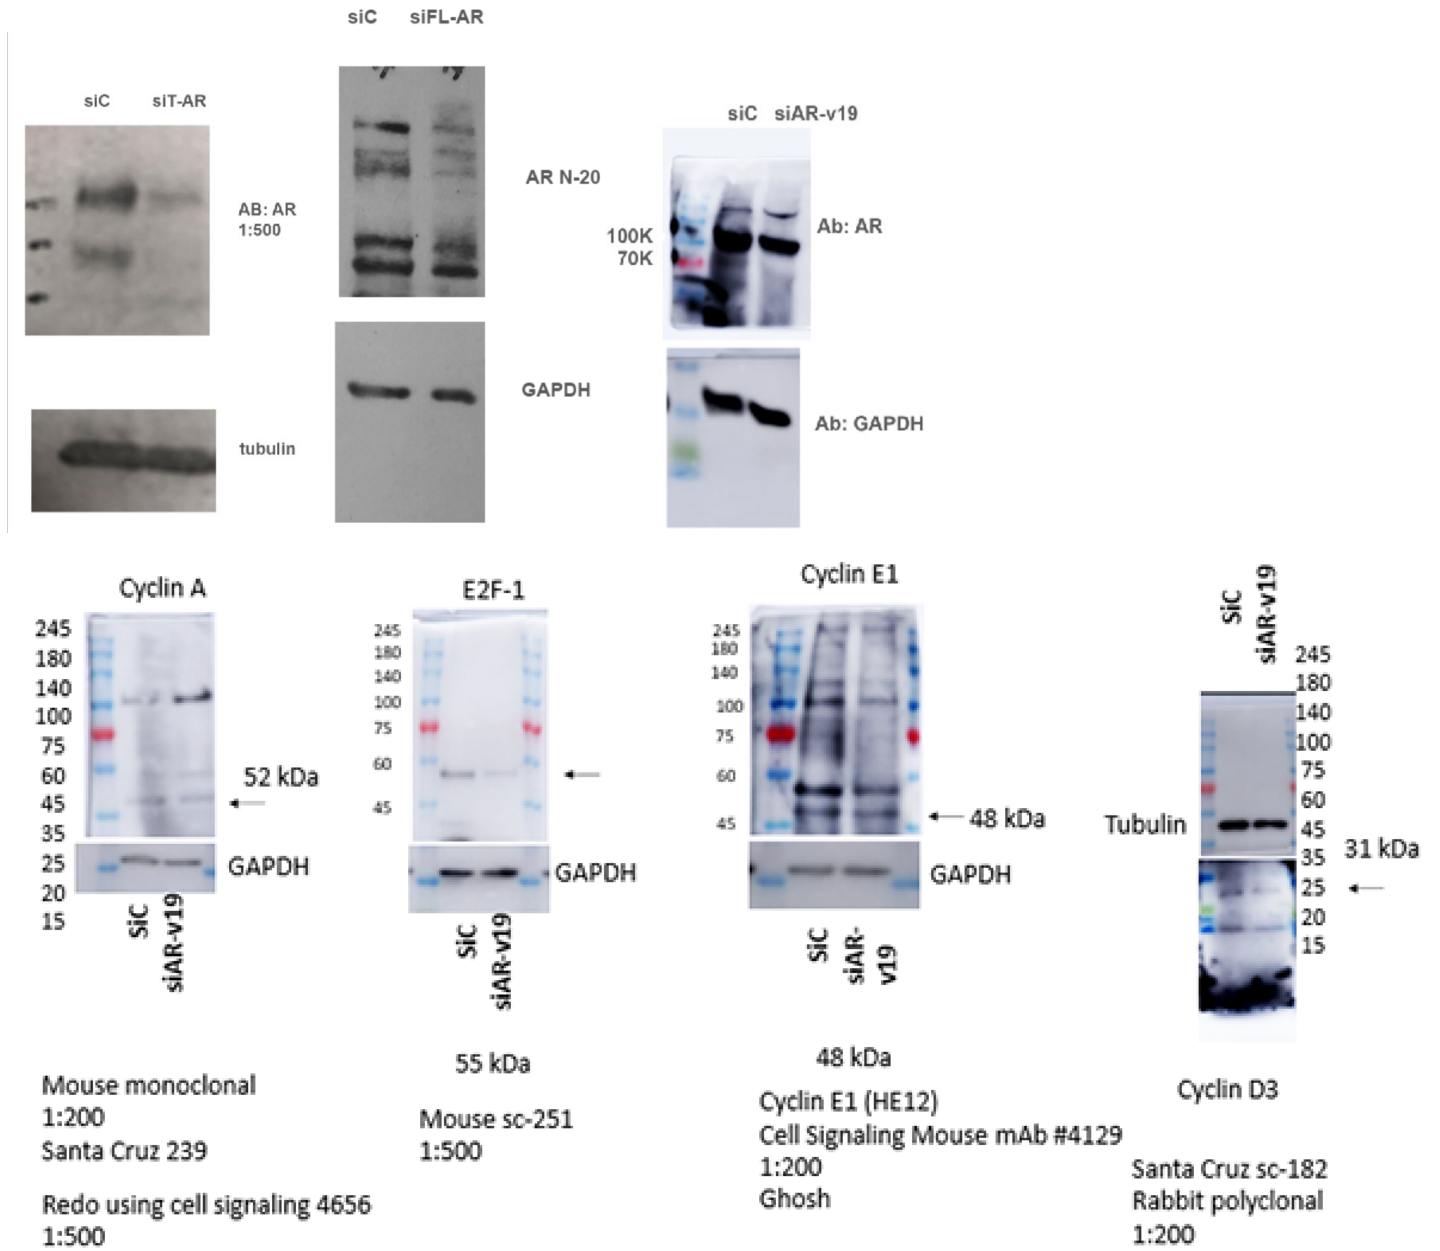

Supplementary Figure 7 con't. Top row from left to right Fig 5A, Fig. 6; bottom row Fig 7G.

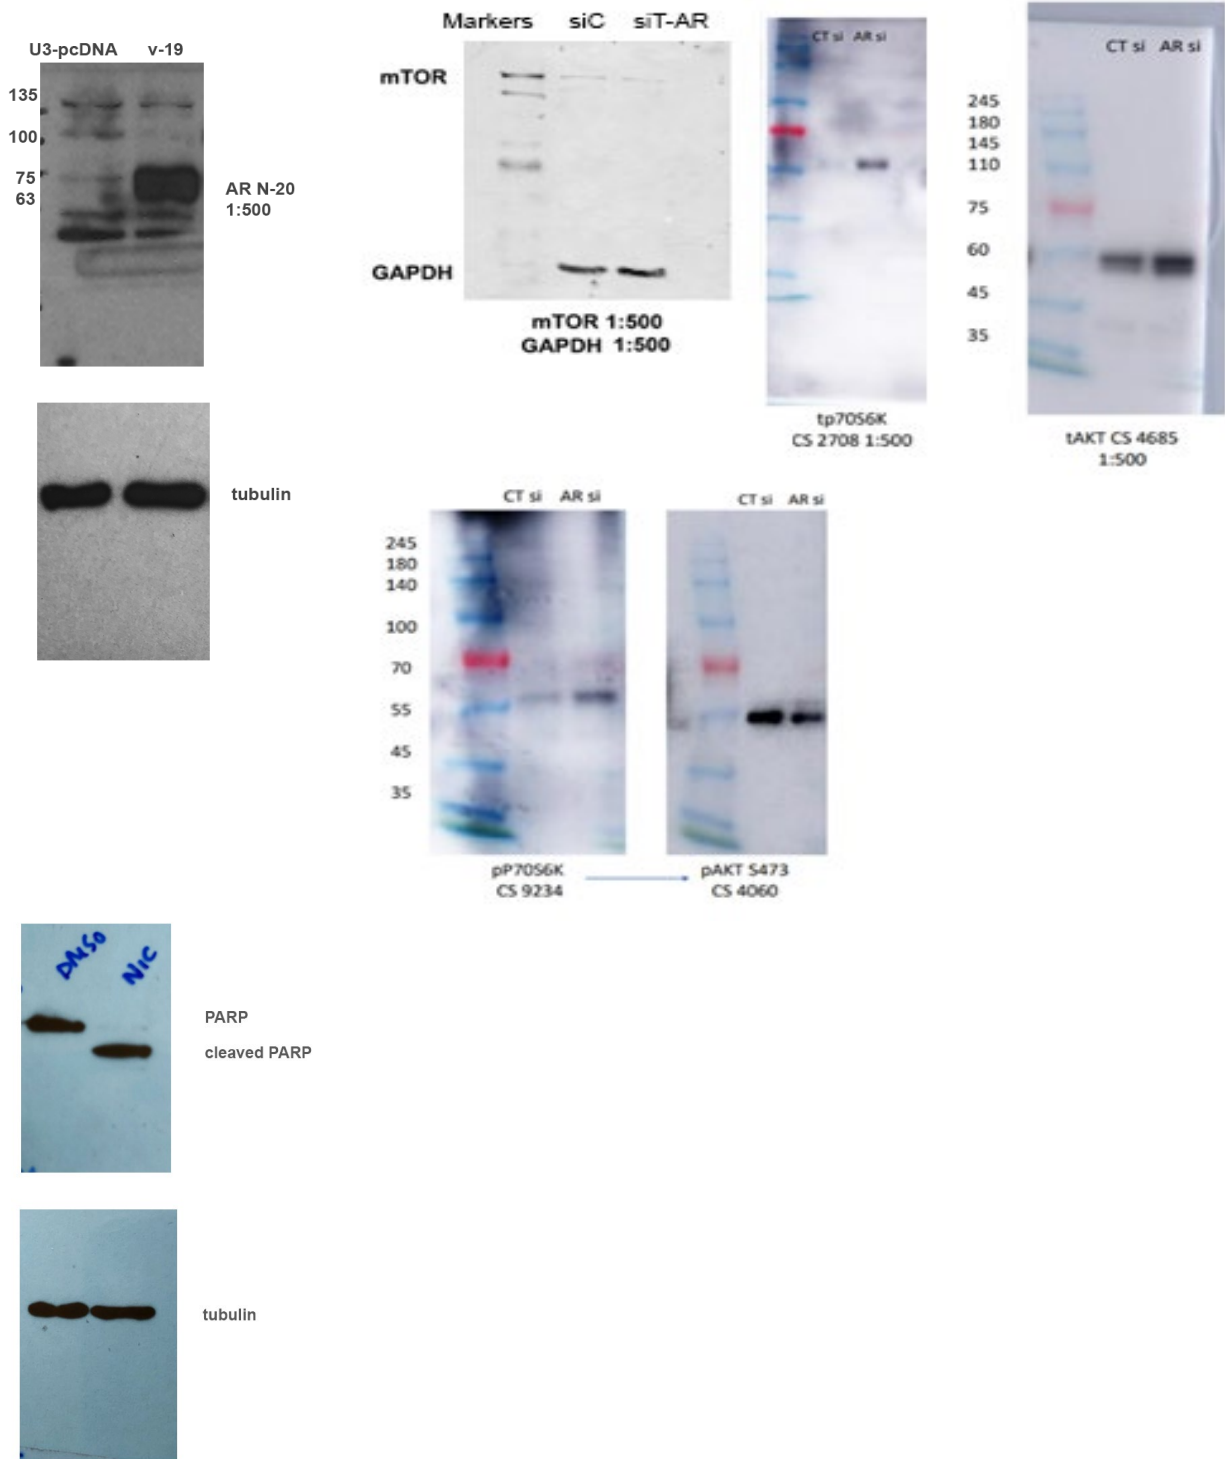

## Supplementary Table.

### Contents

total AR transcriptome

unique to total AR k/d

LBD transcriptome

AR-v19 transcriptome

AR-V19 top 5 pathways

AR-V19 top 250

altered on AR-v19 overexpression

inv. Regulated on V19 overexpression vs V19 k/d

lncRNA total AR k/d

singularly listed total AF k/d

targets of total AR k/d

lncRNA LBD k/d

targets of LBD k/d

lncRNA V19 k/d

singularly listed V19 k/d

targets of V19 k/d

lncRNA V19 overexpressed

singularly listed v19 overexpressed

targets of V19 overexpressed

inversely reg v19 overexpressed vs V19 k/d
